# Supplementary material for: Mechanical Force-Induced Color-Variable Luminescence of Carbon Dots in Boric Acid Matrix
Source: MDPI journal article supplement (doi:10.3390/molecules28083388), 2023-04-12
Supplement: s1 [file s1]

## Supporting Information

### Mechanical Force-Induced Color-Variable Luminescence of Carbon Dots in Boric Acid Matrix

Shuai Meng <sup>1†</sup>, Dengke Cheng <sup>1†</sup>, Hailing Gu <sup>1</sup>, Yuchen Li <sup>1</sup>, Yukun Qin <sup>2</sup>, and Jing Tan <sup>1,\*</sup>, Qijun Li <sup>3,\*</sup>

<sup>1</sup> Institute of Micro-nano Optoelectronics and Terahertz Technology, School of Mechanical Engineering, Jiangsu University, Zhenjiang 212013, China

<sup>2</sup> Institute for Energy Research, Jiangsu University, Zhenjiang 212013, China

<sup>3</sup> School of Mechanical Engineering, Yangzhou University, Yangzhou 225009, China

\* Correspondence: tanjing@ujs.edu.cn; liqijun@yzu.edu.cn

† These authors contributed equally to this work.

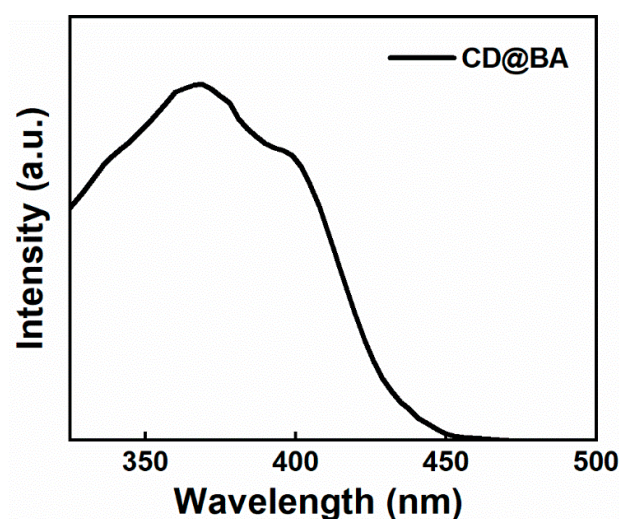

Figure S1 Phosphorescence excitation spectrum of CD@BA bulk under 530 nm emission.

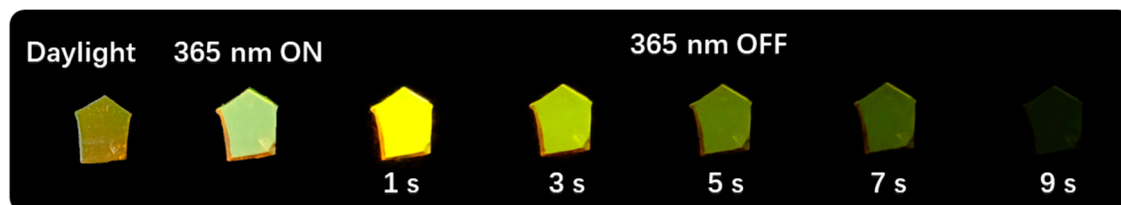

Figure S2 Digital photographs of CD@BA bulk before and after turning off the 365 nm UV-irradiation source and under daylight conditions.

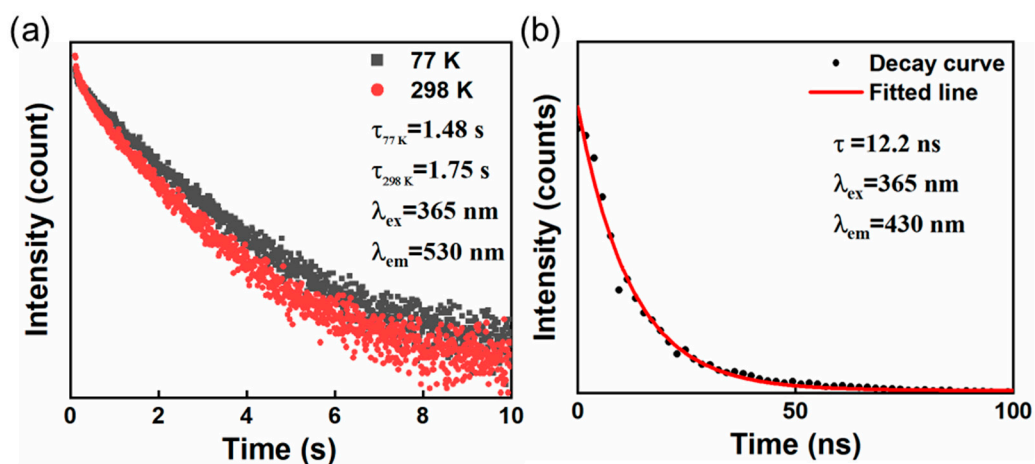

Figure S3 (a) Room temperature phosphorescence decay curves of CD@BA bulk at 77k and 298k respectively. ( $\lambda_{\text{ex}} = 365\text{ nm}$  and  $\lambda_{\text{em}} = 530\text{ nm}$ ); (b) FL decay curve of CD@BA bulk.

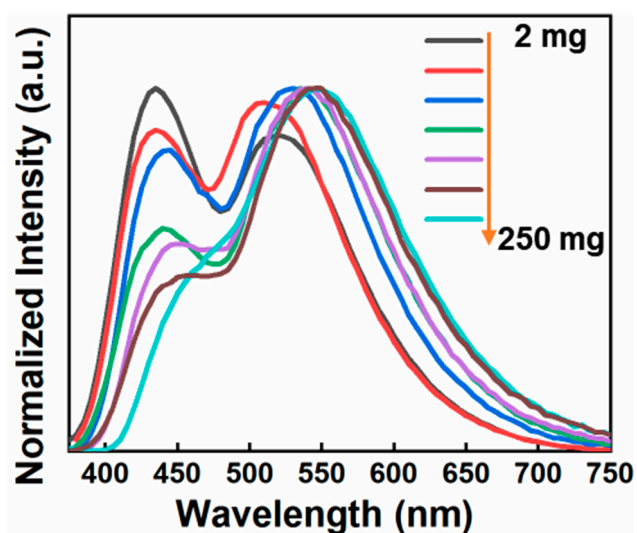

Figure S4 The normalized PL emission spectra of CD@BA bulk with different CDs concentrations under 365 nm lamp; from top to bottom: 2, 13, 50, 100, 150, 200 and 250 mg.

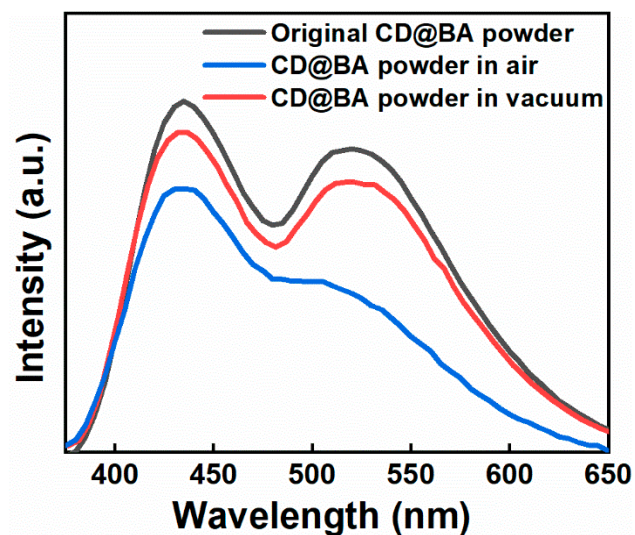

Figure S5 PL emission spectra of CD@BA powder stored in air and vacuum environment, respectively.

Table S1 emission spectral data of CD@BA with different CDs concentration

| Serial number | CDs concentration (mg) | Fluorescence peak position (nm) | Phosphorescence peak position (nm) |
|---------------|------------------------|---------------------------------|------------------------------------|
| 1             | 2                      | 428                             | 520                                |
| 2             | 13                     | 430                             | 520                                |
| 3             | 50                     | 440                             | 530                                |
| 4             | 100                    | 440                             | 535                                |
| 5             | 150                    | 450                             | 540                                |
| 6             | 200                    | 450                             | 545                                |
| 7             | 250                    | 450                             | 545                                |
